# Supplementary material for: Transcriptomic Response to Drought Stress in Populus davidiana Dode
Source: MDPI journal article supplement (doi:10.3390/f14071465), 2023-07-17
Supplement: s1 [file s1]

Archive with 3 entries (3 files):
- Suppl. Table S1 Transcription factors response to drought stress.xlsx
- Suppl. Table S2 DEGs invoved in defense responses to drought stress.xlsx
- Suppl. Table S3 Genes that change under drought stress and their functions.pdf
