# Supplementary material for: Transcriptomic Response to Drought Stress in Populus davidiana Dode
Source: MDPI journal article supplement (doi:10.3390/f14071465), 2023-07-17
Supplement: s1 [file s1 › Suppl. Table S1 Transcription factors response to drought stress.xlsx]

## Sheet: NEW
Suppl. Table S1 Transcription factors response to drought stress
Family	Gene ID	Log2FoldChange	Up/Down	Description
MYB	Potri.006G221800	2.25409	Up	MYB-related protein 308
	Potri.013G076800	2.13383	Up	MYB-like protein
	Potri.003G064600	-2.02218	Down	transcription factor MYB114
	Potri.008G101400	3.67527	Up	transcription factor MYB108
	Potri.007G093900	-1.63813	Down	transcription factor MYB53
	Potri.012G084100	-3.42082	Down	MYB family protein
	Potri.004G015100	-3.67795	Down	MYB-like family protein
	Potri.006G221500	-3.80101	Down	MYB family protein
	Potri.010G064000	2.70058	Up	MYB-related protein 305
	Potri.010G149900	6.17761	Up	transcription factor MYB108
	Potri.004G126700	4.25362	Up	MYB-related protein 306
	Potri.008G122100	2.39813	Up	transcription factor MYB62
	Potri.003G189700	-1.19543	Down	transcription factor MYB33 isoform X1
	Potri.006G150300	1.34814	Up	transcription factor MYBS3
	Potri.005G224100	1.96299	Up	transcription factor MYB14
	Potri.002G200600	1.50465	Up	L10-interacting MYB domain-containing protein
	Potri.004G021300	2.49334	Up	MYB-like transcription factor ETC1
	Potri.019G081500	3.06543	Up	transcription factor MYB8
	Potri.018G127700	2.24355	Up	transcription factor MYB82
	Potri.001G036000	2.44512	Up	transcription factor MYB33 isoform X1
	Potri.001G189800	1.85108	Up	transcription factor MYBS3 isoform X1
	Potri.010G039233	1.60304	Up	transcription factor MYB1R1-like
	Potri.006G191000	1.26476	Up	MYB family transcription factor PHL5
	Potri.012G073900	2.17134	Up	transcription factor MYB1R1
	Potri.009G061500	-1.55993	Down	MYB transcription factor
	Potri.019G032700	1.09994	Up	MYB-related protein 2 isoform X1
	Potri.006G241700	-1.60849	Down	transcription factor MYB3R-1 isoform X2
	Potri.018G151400	2.70058	Up	MYB family transcription factor PHL6
	Potri.006G155200	2.39813	Up	MYB family transcription factor EFM
	Potri.008G148400	-2.47916	Down	transcription factor MYB124 protein
	Potri.004G033100	7.62421	Up	transcription factor MYB102
	Potri.007G003200	1.09353	Up	MYB family transcription factor PHL6
	Potri.010G093000	-2.30225	Down	transcription factor MYB124 isoform X2
	Potri.003G219900	1.16438	Up	transcription repressor MYB5
	Potri.013G148600	3.41669	Up	transcription factor MYB41
	Potri.014G081200	1.13924	Up	transcription factor MYB41
	Potri.001G086700	2.98006	Up	transcription factor MYB13
	Potri.006G122100	1.98749	Up	transcription factor MYB27 isoform X2
	Potri.008G191800	2.64485	Up	transcription factor MYB1R1
	Potri.012G055600	1.78267	Up	transcription factor MYB62
	Potri.010G123000	-1.15502	Down	transcription factor MYB62
	Potri.007G048900	1.25452	Up	MYB family protein
	Potri.006G000800	1.34174	Up	MYB family transcription factor PHL7-like isoform X2
	Potri.003G100100	1.30987	Up	MYB family transcription factor PHL11
	Potri.013G130900	1.96299	Up	MYB protein
	Potri.019G118900	-2.74863	Down	transcription factor MYB4
	Potri.010G004300	1.05709	Up	MYB family protein
	Potri.015G046200	4.10134	Up	transcription factor MYB62
	Potri.003G114100	-2.51294	Down	MYB family protein
	Potri.019G045900	1.22959	Up	MYB-related protein 306
	Potri.001G336700	-2.82795	Down	MYB-related protein 315
	Potri.005G063200	1.96299	Up	MYB family protein
	Potri.001G408700	3.75215	Up	transcription factor MYB41
	Potri.009G053900	-1.45046	Down	MYB transcription factor
	Potri.006G230500	-1.38207	Down	transcription factor MYBS3
	Potri.005G001600	-5.76886	Down	MYB family protein
	Potri.017G082500	7.32543	Up	MYB-related protein 306
	Potri.001G470500	1.91336	Up	transcription factor MYB80
	Potri.015G033600	-1.31028	Down	MYB transcription factor
	Potri.015G041100	2.39813	Up	transcription factor MYB3
	Potri.014G100800	1.96299	Up	MYB-related protein 308
	Potri.007G008600	-1.22696	Down	MYB-like protein X
	Potri.004G138000	-1.34663	Down	MYB-related protein 308
	Potri.013G149200	-1.02655	Down	transcription factor MYB4
	Potri.011G041600	8.38129	Up	transcription factor MYB102
	Potri.017G125600	3.5081	Up	transcription factor MYB113 isoform X2
	Potri.013G067000	1.24919	Up	MYB family protein
	Potri.002G173900	6.11975	Up	MYB-related protein 308
WRKY	Potri.015G064100	2.98006	Up	probable WRKY transcription factor 72
	Potri.002G164400	2.182	Up	WRKY family protein
	Potri.011G087900	1.67289	Up	WRKY family protein
	Potri.011G007800	3.5786	Up	probable WRKY transcription factor 31 isoform X4
	Potri.008G094000	4.19964	Up	probable WRKY transcription factor 57
	Potri.006G109100	-1.19543	Down	WRKY family protein
	Potri.017G149000	3.14238	Up	probable WRKY transcription factor 27
	Potri.011G157100	1.80687	Up	probable WRKY transcription factor 14
	Potri.016G128300	4.14357	Up	XP_002323637.2 probable WRKY transcription factor 33
	Potri.016G083600	2.33125	Up	WRKY transcription factor 44
	Potri.016G137900	1.23267	Up	WRKY family protein
	Potri.002G186600	1.41324	Up	probable WRKY transcription factor 47
	Potri.001G352400	2.02318	Up	probable WRKY transcription factor 28
	Potri.018G019800	3.12684	Up	probable WRKY transcription factor 40
	Potri.006G087000	2.39813	Up	probable WRKY transcription factor 49
	Potri.001G361600	1.02094	Up	probable WRKY transcription factor 20 isoform X2
	Potri.008G091900	-2.51294	Down	probable WRKY transcription factor 3
	Potri.005G203200	1.01835	Up	probable WRKY transcription factor 71
	Potri.006G072400	1.12019	Up	WRKY family protein
	Potri.002G123300	-1.10359	Down	probable WRKY transcription factor 7 isoform X1
	Potri.015G099200	6.71925	Up	probable WRKY transcription factor 43
	Potri.014G155100	1.77232	Up	probable WRKY transcription factor 31
	Potri.014G050000	-3.03155	Down	WRKY family protein
	Potri.004G060900	-1.41667	Down	probable WRKY transcription factor 65 isoform X1
	Potri.002G168700	-2.21153	Down	probable WRKY transcription factor 46 isoform X1
	Potri.017G066860	1.96299	Up	probable WRKY transcription factor 75
	Potri.004G007500	4.95316	Up	probable WRKY transcription factor 31
	Potri.002G059100	2.49044	Up	probable WRKY transcription factor 71
	Potri.013G086000	1.26762	Up	WRKY transcription factor WRKY24
	Potri.008G103300	3.59899	Up	probable WRKY transcription factor 48 isoform X1
	Potri.001G092900	1.34914	Up	probable WRKY transcription factor 41
	Potri.010G160100	3.0551	Up	probable WRKY transcription factor 57
	Potri.006G133200	2.41699	Up	WRKY transcription factor 44
	Potri.005G055300	-1.46028	Down	WRKY family protein
	Potri.002G228400	2.19635	Up	probable WRKY transcription factor 31
	Potri.019G123500	2.59496	Up	WRKY transcription factor WRKY24
	Potri.010G163000	3.15703	Up	probable WRKY transcription factor 4
	Potri.014G090300	1.60894	Up	WRKY family protein
	Potri.010G147700	3.23709	Up	probable WRKY transcription factor 48
	Potri.002G193000	2.12004	Up	probable WRKY transcription factor 23 isoform X1
	Potri.013G153400	3.13286	Up	probable WRKY transcription factor 25
	Potri.014G111900	2.87268	Up	probable WRKY transcription factor 47
	Potri.014G090700	-1.75093	Down	probable WRKY transcription factor 43
	Potri.003G169100	2.57672	Up	probable WRKY transcription factor 75
	Potri.017G088300	1.0367	Up	WRKY family protein
	Potri.001G044500	1.45275	Up	WRKY40 transcription factor
	Potri.005G141400	2.39813	Up	probable WRKY transcription factor 7 isoform X1
	Potri.003G138600	4.39679	Up	probable WRKY transcription factor 41
C2H2	Potri.014G114900	1.30351	Up	C2H2-like zinc finger protein
	Potri.009G158600	2.08842	Up	C2H2 zinc-finger protein SERRATE (SE)
	Potri.001G157700	-1.2697	Down	C2H2 family protein
	Potri.003G010400	1.10223	Up	C2H2 family protein
	Potri.003G077200	-2.6356	Down	C2H2 family protein
	Potri.001G249900	-2.74741	Down	C2H2 family protein
	Potri.013G019200	1.5277	Up	C2H2 family protein
NAC	Potri.013G079700	1.71908	Up	NAC domain-containing protein 71
	Potri.006G277000	1.27573	Up	NAC domain-containing protein 100 isoform X1
	Potri.017G016700	-1.49138	Down	NAC family protein
	Potri.005G200100	1.57616	Up	NAC family protein
	Potri.003G022800	1.06775	Up	NAC domain-containing protein 104
	Potri.004G038000	2.84696	Up	NAC transcription factor 25
	Potri.001G218800	1.68674	Up	NAC domain-containing protein 90
	Potri.014G025700	1.28104	Up	NAC transcription factor 29 isoform X1
	Potri.005G098200	4.49688	Up	NAC domain-containing protein 21/22 isoform X1
	Potri.017G086200	2.85843	Up	NAC domain-containing protein 100
	Potri.005G116800	-3.59722	Down	NAC domain transcription factor 5B
	Potri.007G099400	2.39152	Up	NAC domain-containing protein 2
	Potri.008G031800	1.09489	Up	NAC domain-containing protein 78 isoform X1
	Potri.014G107500	-1.54735	Down	NAC domain-containing protein 40
	Potri.015G046800	-1.57824	Down	NAC domain-containing protein 92
	Potri.002G154100	-2.90749	Down	NAC domain-containing protein 53 isoform X1
	Potri.002G178700	-1.99952	Down	NAC family protein
	Potri.011G123500	3.19078	Up	NAC family protein
	Potri.001G206900	-1.48008	Down	NAC domain-containing protein 104
	Potri.005G225800	1.48605	Up	NAC domain-containing protein 21/22
	Potri.005G069500	2.54198	Up	NAC domain-containing protein 2
	Potri.007G135300	-2.44747	Down	NAC family protein
	Potri.010G166200	3.41669	Up	NAC transcription factor 29
	Potri.002G081000	3.87884	Up	NAC domain-containing protein 2
	Potri.012G007500	1.91054	Up	NAC domain-containing protein 91
	Potri.003G113000	-3.19008	Down	NAC family protein
	Potri.002G037100	2.56231	Up	NAC family protein
	Potri.015G127400	-2.3069	Down	NAC family protein
	Potri.011G123300	8.29497	Up	NAC domain-containing protein 72
	Potri.007G065400	3.78202	Up	NAC domain-containing protein 21/22 isoform X2
	Potri.013G054000	3.06338	Up	NAC transcription factor 47
	Potri.005G180200	4.74252	Up	NAC domain-containing protein 2
	Potri.001G404100	7.26865	Up	NAC domain-containing protein 72
	Potri.001G404400	3.10206	Up	NAC family protein
	Potri.001G325100	2.58736	Up	NAC family protein
	Potri.001G120000	-2.90314	Down	NAC domain-containing protein 7
	Potri.006G209200	1.58316	Up	NAC domain-containing protein 90
	Potri.008G089000	6.82125	Up	NAC transcription factor 29
	Potri.007G014400	-3.7132	Down	NAC domain transcription factor 5A
	Potri.004G181900	1.56462	Up	NAC domain-containing protein 22
	Potri.015G020000	4.02447	Up	NAC domain-containing protein 100
	Potri.009G019200	3.41669	Up	NAC domain-containing protein 90
	Potri.019G031400	1.16711	Up	NAC transcription factor 47
	Potri.012G001400	2.18452	Up	NAC domain-containing protein 100
TCP	Potri.001G060000	2.68726	Up	transcription factor TCP20
	Potri.015G050500	-3.30545	Down	transcription factor TCP12
	Potri.004G116100	2.57368	Up	transcription factor TCP13 isoform X1
	Potri.004G222100	-2.60589	Down	transcription factor TCP8
	Potri.017G094800	1.17466	Up	transcription factor TCP13
	Potri.001G375800	1.68818	Up	transcription factor TCP4
	Potri.001G111800	1.72009	Up	transcription factor TCP9
	Potri.011G055500	-2.85844	Down	transcription factor TCP14
	Potri.005G090300	-1.85674	Down	TCP family protein
	Potri.017G068748	1.01835	Up	transcription factor TCP20
Bzip	Potri.008G018400	-1.63813	Down	bZIP family protein
	Potri.001G136000	2.21732	Up	bZIP transcription factor 16-like isoform X1
	Potri.003G097600	2.07902	Up	bZIP transcription factor 16
	Potri.006G039000	1.32491	Up	bZIP family protein
	Potri.009G018500	-1.75093	Down	bZIP family protein
	Potri.002G125400	2.17435	Up	bZIP transcription factor TRAB1
	Potri.016G032400	1.19999	Up	bZIP transcription factor 17
	Potri.008G106700	1.68674	Up	bZIP transcription factor 53
	Potri.005G257900	1.53827	Up	bZIP transcription factor 60 isoform X1
	Potri.008G113400	-2.23112	Down	bZIP family protein
	Potri.010G142900	7.35401	Up	bZIP transcription factor
	Potri.007G085700	1.20221	Up	bZIP family protein
	Potri.004G158200	-1.21168	Down	bZIP family protein
bHLH	Potri.006G057600	1.12989	Up	transcription factor bHLH130 isoform X2
	Potri.001G185900	-1.863	Down	transcription factor bHLH68 isoform X3
	Potri.012G132000	-1.90516	Down	transcription factor bHLH118
	Potri.009G129600	1.14048	Up	transcription factor bHLH121
	Potri.004G156000	-3.62644	Down	bHLH family protein
	Potri.013G041000	-1.11346	Down	bHLH family protein
	Potri.006G202100	3.83321	Up	transcription factor bHLH91
	Potri.003G051600	-1.34897	Down	transcription factor bHLH68 isoform X2
	Potri.004G055700	1.18326	Up	transcription factor bHLH106
	Potri.016G051100	-2.4582	Down	transcription factor bHLH48
	Potri.002G231700	1.37274	Up	bHLH family protein
	Potri.016G050500	1.59647	Up	transcription factor bHLH130
	Potri.010G130000	-3.72698	Down	bHLH family protein
	Potri.005G113400	1.66633	Up	transcription factor bHLH121
	Potri.014G099700	1.45252	Up	transcription factor bHLH13
	Potri.001G191800	2.56231	Up	transcription factor bHLH87
	Potri.010G136100	1.1536	Up	transcription factor bHLH49
	Potri.009G117300	-1.07057	Down	transcription factor bHLH63 isoform X2
	Potri.008G113200	-2.25044	Down	transcription factor bHLH49 isoform X1
	Potri.002G180300	-1.07066	Down	transcription factor bHLH67 isoform X2
	Potri.007G023600	-1.69563	Down	bHLH family protein
	Potri.010G186700	4.45996	Up	bHLH family protein
	Potri.018G083700	-1.60019	Down	bHLH family protein
	Potri.001G017300	1.52421	Up	transcription factor bHLH122 isoform X2
	Potri.018G109500	1.36974	Up	transcription factor bHLH66
	Potri.018G141600	-1.29049	Down	transcription factor bHLH35 isoform X1
	Potri.015G142700	2.01608	Up	transcription factor bHLH47
	Potri.011G053400	-6.02317	Down	transcription factor bHLH162 isoform X2
	Potri.006G037100	-2.92825	Down	bHLH family protein
	Potri.019G089000	1.11627	Up	transcription factor bHLH30
	Potri.015G134300	-2.36124	Down	transcription factor bHLH36 isoform X2
	Potri.002G159400	-1.58224	Down	bHLH family protein
	Potri.010G208600	1.69569	Up	transcription factor bHLH123-like
	Potri.017G115300	-1.69563	Down	transcription factor bHLH75
	Potri.009G081400	6.76737	Up	transcription factor bHLH18 isoform X1
	Potri.002G143300	1.20105	Up	bHLH family protein
	Potri.008G070800	-2.02547	Down	transcription factor bHLH51 isoform X1
	Potri.005G230800	-2.81803	Down	transcription factor bHLH110 isoform X2
	Potri.013G126800	1.13279	Up	bHLH family protein
AP2/ERF	Potri.008G117100	2.04769	Up	AP2/ERF and B3 domain-containing transcription repressor RAV2
	Potri.010G129200	2.76243	Up	AP2/ERF and B3 domain-containing transcription repressor TEM1
	Potri.018G109201	1.67546	Up	AP2/ERF and B3 domain-containing transcription factor
GATA	Potri.018G053600	2.19635	Up	putative GATA transcription factor 22
	Potri.002G142800	3.21465	Up	GATA transcription factor 4
	Potri.005G122700	-1.273	Down	GATA transcription factor 18
	Potri.019G033000	-1.31028	Down	GATA transcription factor 2
	Potri.009G123400	1.24795	Up	GATA transcription factor 5
	Potri.013G059600	-2.52885	Down	GATA transcription factor 2
	Potri.005G020500	1.80687	Up	GATA transcription factor 16
	Potri.004G161500	1.7157	Up	GATA transcription factor 5
	Potri.014G124400	1.70482	Up	GATA transcription factor 16
	Potri.005G117600	-1.17768	Down	GATA transcription factor 5
	Potri.008G038900	-1.11809	Down	GATA transcription factor 8
MADS-box	Potri.002G109601	2.39813	Up	MADS-box transcription factor 23 isoform X2
	Potri.005G150501	2.70058	Up	MADS-box transcription factor 23 isoform X1
	Potri.015G134800	2.59062	Up	MADS-box transcription factor 6
	Potri.003G170000	1.47213	Up	MADS-box transcription factor 14 isoform X5
GTE	Potri.001G335000	2.39225	Up	transcription factor GTE8
	Potri.009G080000	1.31168	Up	transcription factor GTE7
	Potri.001G355300	1.78805	Up	transcription factor GTE12
	Potri.004G223700	1.08234	Up	transcription factor GTE11 isoform X1
	Potri.019G090700	2.20085	Up	transcription factor GTE4 isoform X1
	Potri.001G285700	1.77002	Up	transcription factor GTE7
	Potri.013G118900	1.87022	Up	transcription factor GTE4
	Potri.012G094300	2.46822	Up	transcription factor GTE10
GRAS	Potri.007G029200	-1.56413	Down	GRAS family transcription factor
	Potri.003G122400	2.72604	Up	GRAS family protein
	Potri.006G016200	2.05218	Up	GRAS family protein
VIP	Potri.017G076400	1.73971	Up	inositol hexakisphosphate and diphosphoinositol-pentakisphosphate kinase VIP2-like isoform X1
TGA	Potri.005G082000	1.04196	Up	transcription factor TGA1 isoform X2
	Potri.009G164300	1.25131	Up	transcription factor TGA9 isoform X2
	Potri.008G118300	-1.69563	Down	transcription factor TGA2.2 isoform X1
