# Supplementary material for: Transcriptomic Response to Drought Stress in Populus davidiana Dode
Source: MDPI journal article supplement (doi:10.3390/f14071465), 2023-07-17
Supplement: s1 [file s1 › Suppl. Table S2 DEGs invoved in defense responses to drought stress.xlsx]

## Sheet: Sheet1
Suppl. Table S2 DEGs invoved in defense responses to drought stress
Class	Gene ID	Log2FoldChange	Up/Down	Description
Reactive oxygen species (ROS)	Potri.001G113800	-1.18031	Down	copper chaperone for superoxide dismutase, chloroplastic/cytosolic
	Potri.005G089600	1.26158	Up	superoxide dismutase [Fe] 3, chloroplastic
	Potri.009G005100	-1.38382	Down	superoxide dismutase [Cu-Zn], chloroplastic
	Potri.015G110400	3.05377	Up	superoxide dismutase [Fe], chloroplastic isoform X1
	Potri.013G056900	1.00269	Up	superoxide dismutase [Cu-Zn] 2
	Potri.002G018000	-1.19543	Down	peroxidase
	Potri.001G011200	-1.88056	Down	peroxidase
	Potri.010G134500	-3.26801	Down	class III peroxidase
	Potri.007G122100	-5.83915	Down	peroxidase 3
	Potri.013G083600	6.10807	Up	peroxidase
	Potri.003G214800	-2.9746	Down	peroxidase
	Potri.007G053400	-2.99799	Down	peroxidase
	Potri.017G037900	-5.20149	Down	peroxidase
	Potri.001G011000	-1.11346	Down	peroxidase A2
	Potri.007G019300	-1.98392	Down	peroxidase 72
	Potri.001G351000	-2.4173	Down	peroxidase 31
	Potri.007G074700	-2.43063	Down	peroxidase
	Potri.018G089900	1.30117	Up	peroxidase
	Potri.013G156500	-5.6096	Down	peroxidase
	Potri.006G069600	-3.5095	Down	peroxidase 25
	Potri.006G254500	1.15128	Up	putative L-ascorbate peroxidase 6 isoform X2
	Potri.014G143200	6.38929	Up	peroxidase
	Potri.002G009800	2.21452	Up	Catalase isozyme 1
	Potri.005G251600	4.17534	Up	Catalase isozyme 1
	Potri.005G100400	1.05976	Up	Catalase-2
	Potri.006G254500	1.15128	Up	putative L-ascorbate peroxidase 6 isoform X2
	Potri.010G211600	-2.10146	Down	Glutathione S-transferase DHAR2
	Potri.016G023200	1.99561	Up	probable glutathione S-transferase
	Potri.010G061800	1.10955	Up	probable glutathione S-transferase
	Potri.001G437400	1.3726	Up	probable glutathione S-transferase
	Potri.010G061600	5.37549	Up	glutathione transferase GST 23
	Potri.017G138800	1.46826	Up	glutathione S-transferase F12
	Potri.010G035500	1.3726	Up	glutathione S-transferase U22
	Potri.001G113100	4.25717	Up	leucoanthocyanidin dioxygenase
	Potri.003G119100	7.59833	Up	leucoanthocyanidin dioxygenase
	Potri.003G138400	1.36724	Up	putative anthocyanidin reductase
	Potri.001G093300	4.49688	Up	putative anthocyanidin reductase isoform X1
	Potri.014G041800	2.25025	Up	anthocyanidin 3-O-glucosyltransferase 5
	Potri.007G030500	2.34855	Up	anthocyanidin 3-O-glucosyltransferase 5
	Potri.006G007200	1.34006	Up	anthocyanidin 3-O-glucosyltransferase 6 isoform X1
	Potri.016G016900	1.6669	Up	anthocyanidin 3-O-glucosyltransferase 2
	Potri.006G007350	3.59409	Up	anthocyanidin 3-O-glucosyltransferase 6
	Potri.013G143900	1.902	Up	anthocyanidin 3-O-glucosyltransferase 7
	Potri.016G017400	1.34914	Up	anthocyanidin 3-O-glucosyltransferase 6
	Potri.006G007300	1.96299	Up	anthocyanidin 3-O-glucosyltransferase 6
	Potri.013G118700	2.035	Up	anthocyanidin 3-O-glucosyltransferase 7
Lignin biosynthetic	Potri.001G045800	2.39813	Up	Cinnamoyl-CoA reductase 1
	Potri.001G140700	7.38473	Up	cinnamoyl-CoA reductase-like SNL6
	Potri.005G257700	-2.6882	Down	Cinnamoyl-CoA reductase 1
	Potri.004G230900	-2.0881	Down	cinnamoyl-CoA reductase 2
	Potri.001G046400	1.28018	Up	cinnamoyl-CoA reductase 1
	Potri.001G046100	1.96299	Up	Cinnamoyl-CoA reductase 1
	Potri.011G148200	1.4597	Up	probable cinnamyl alcohol dehydrogenase 1
	Potri.009G095800	-1.34334	Down	cinnamyl alcohol dehydrogenase
Sugar	Potri.002G018300	-2.95377	Down	Probable cinnamyl alcohol dehydrogenase 6
	Potri.004G118600	-2.76664	Down	UDP-glucose 6-dehydrogenase 4
	Potri.017G059100	-1.71956	Down	UDP-glucuronate 4-epimerase 6
	Potri.001G320000	-3.51874	Down	UDP-glucuronate 4-epimerase 6
	Potri.002G146500	-2.04813	Down	UDP-glucuronate 4-epimerase 3
	Potri.012G128200	-2.10941	Down	UDP-glucuronate 4-epimerase 2
	Potri.001G090700	2.25738	Up	UDP-glucose 4-epimerase 5
	Potri.003G140900	1.89028	Up	UDP-glucose 4-epimerase 2
	Potri.017G092000	-2.81372	Down	UDP-glucose 6-dehydrogenase
	Potri.016G139100	-1.83452	Down	UDP-galactose/UDP-glucose transporter 3
	Potri.003G114600	1.67174	Up	UDP-glucuronate 4-epimerase 5
	Potri.008G094300	-4.84891	Down	UDP-glucose 6-dehydrogenase 5
	Potri.009G150600	-1.75071	Down	UDP-D-apiose/UDP-D-xylose synthase 2
	Potri.004G189900	-4.17291	Down	UDP-D-apiose/UDP-D-xylose synthase 2
	Potri.005G220400	1.64414	Up	Fructokinase-1
	Potri.017G126300	1.23039	Up	Probable fructokinase-6
	Potri.017G029000	-5.14462	Down	Probable fructokinase-4
Drought stress responsive proteins	Potri.001G042600	1.71415	Up	heat shock 70 kDa protein
	Potri.004G073600	1.44351	Up	heat shock protein 83
	Potri.014G131701	-4.35921	Down	heat shock factor-binding protein 1
	Potri.006G093500	2.4827	Up	class I heat shock protein
	Potri.011G139100	-3.49562	Down	heat shock 70 kDa protein 16 isoform X1
	Potri.007G043800	1.32079	Up	heat shock transcription factor B1
	Potri.003G095000	1.09533	Up	heat shock factor protein HSF8
	Potri.010G088600	1.54252	Up	heat shock 70 kDa protein 8
	Potri.019G081200	-1.63031	Down	kDa class I heat shock protein-like
	Potri.004G187450	-1.45046	Down	kDa class I heat shock protein
	Potri.008G112700	2.76365	Up	heat shock protein 90-5, chloroplastic
	Potri.014G164900	1.0102	Up	heat shock protein 90-6, mitochondrial isoform X1
	Potri.003G006300	1.82601	Up	stromal 70 kDa heat shock-related protein, chloroplastic
	Potri.001G192600	4.36414	Up	kDa heat shock protein, mitochondrial
	Potri.010G136800	2.21012	Up	heat shock protein 90-5, chloroplastic
	Potri.012G001100	1.80441	Up	heat shock N-terminal domain-containing protein
	Potri.010G205700	-1.45029	Down	heat shock cognate 70 kDa protein 2
	Potri.006G226800	1.63725	Up	heat shock factor protein HSF30
	Potri.001G173200	2.99877	Up	late embryogenesis abundant protein 2
	Potri.016G046350	4.01954	Up	kDa late embryogenesis abundant protein
	Potri.005G048000	4.76527	Up	late embryogenesis abundant protein D-34
	Potri.010G012100	7.05314	Up	late embryogenesis abundant protein Lea5
	Potri.005G193800	5.04858	Up	abscisic stress-ripening protein 3
	Potri.013G117200	-3.99109	Down	somatic embryogenesis receptor kinase 2
	Potri.005G083300	-1.49107	Down	somatic embryogenesis receptor kinase 1
	Potri.014G068700	-1.37961	Down	somatic embryogenesis receptor kinase 2
	Potri.007G102400	1.70329	Up	somatic embryogenesis receptor kinase 1
