# Supplementary material for: Transcriptomic Response to Drought Stress in Populus davidiana Dode
Source: MDPI journal article supplement (doi:10.3390/f14071465), 2023-07-17
Supplement: s1 [file s1 › Suppl. Table S3 Genes that change under drought stress and their functions.pdf]

**Suppl. Table S3 Genes that change under drought stress and their functions**

| <b>Gene</b>     | <b>Function</b>                                                                                                                         |
|-----------------|-----------------------------------------------------------------------------------------------------------------------------------------|
| <i>MYB</i>      | Abiotic stresses<br>Participate in the growth and development of plant roots, stems, leaves, and flowers                                |
| <i>WRKY</i>     | Abiotic stresses, plant senescence, organ development, signaling molecules                                                              |
| <i>C2H2</i>     | Regulates the expression of specific genes, cell development and differentiation, and resistance to the external environment            |
| <i>NAC</i>      | Stress response, growth, and development, hormonal regulation                                                                           |
| <i>TCP</i>      | Evolution, regulation, biochemical characterization of proteins, control of cell proliferation in developing tissues                    |
| <i>bZIP</i>     | Plant growth, biological, and abiotic stresses                                                                                          |
| <i>bHLH</i>     | Flavonoid synthesis, abiotic stress                                                                                                     |
| <i>AP2/ERF</i>  | Nutrition and reproduction                                                                                                              |
| <i>GATA</i>     | Plant growth and development, cell differentiation                                                                                      |
| <i>MADS-box</i> | Pheromone response in yeast, development of floral organs, regulation of flowering time, development of fruit, roots, stems, and leaves |
| <i>GTE</i>      | Protein synthesis                                                                                                                       |
| <i>GRAS</i>     | Plant hormone signaling                                                                                                                 |
| <i>VIP</i>      | Biostress                                                                                                                               |
| <i>TGA</i>      | Oxidative reactions, organ development                                                                                                  |
